# Supplementary material
Source: PubMed Central journal article supplement (PMC1725002)
Supplement: brjsmed_38_6_671__1.pdf [file brjsmed_38_6_671__1.pdf]

# Risico van plotse dood bij oudere atleten: het vergroten van de noemer

## Het uitsluiten van de oudere atleet zou een laatste toevlucht moeten zijn

Publiciteit en campagnes rondom de tragedies van plotse dood bij jonge atleten (incidentie - 1 per 200.000 jonge atleten per jaar)<sup>3</sup> overschaduwden het sterfterisico van oudere atleten. Bevolkingsonderzoeken laten zien dat sterftegetallen tijdens sportbeoefening dramatisch stijgen met de leeftijd,<sup>10</sup> omdat de incidentie van coronaire hartziekten stijgt met de leeftijd. Is dit toeval, of luxeert sport de toename van plotse dood tijdens sportbeoefening? De hoogste cardiale en non-cardiale mortaliteit (het aantal mensen dat overlijdt - de teller) wordt gevonden bij recreatiesporten die populair zijn bij mensen van middelbare leeftijd en ouder, zoals vissen en bowling. Dit komt door het grote aantal deelnemers en de lange tijd die zij aan sport besteden (noemer). Dit laatste zal variëren met verschillende populaties van deelnemers.

$$\text{Sportrisico van deelname} = \frac{\text{aantal sterfgevallen (teller)}}{\text{aantal deelnemers} \times \text{deelnametijd (noemer)}}$$

Gebrek aan informatie over de noemer betekent dat bij de meeste sporten en recreatieve activiteiten het deelnamerisico niet berekend en dus niet vergeleken kan worden. Het verzamelen van de sterftestatistiek zonder dat de noemer bekend is, is vrijwel nutteloos en kan tot onlogische conclusies leiden, bijvoorbeeld dat recreatief vissen gevaarlijker is dan 'hanggliding'.

Veel sporten hebben een aandeel oudere mensen, veelal met een hogere kans op een coronaire hartziekte, dat meedoet. Ik herinner mij een bezoek aan een golfclub, vele jaren gele-

den, een dag nadat iemand op de 12e hole plotseling was gestorven aan de gevolgen van een coronaire hartziekte. De leden waren van mening dat de overledene niet had mogen spelen omdat hij bekend was met een acuut coronair syndroom, en omdat zijn dood had geleid tot een ernstige vertraging van het spel en de ambulance de fairway ernstig had beschadigd.

Moeten wij nu voorkomen dat oudere atleten met een hoog risico op plotse dood deelnemen en mogelijk andere deelnemers in de weg zitten? Zo ja, dan betekent dit dat zij gescreend moeten worden op het risico van plotse dood, met als doel om degenen met een hoog risico uit te sluiten van deelname, en degenen met een normaal risico regelmatig te laten vervolgen. Dit zou vrij duur worden in verhouding tot de relatief lage voorspellende waarde hiervan.<sup>1</sup> En dit zal waarschijnlijk de meerderheid een goede, gezonde sportbeoefening onthouden.

Of dienen we, zoals één van mijn (inmiddels overleden) patiënten aan mij voorstelde, onze verouderende bevolking aan te moedigen om steeds meer risicovolle hobby's te beoefenen, inclusief gevaarlijke sporten, teneinde het risico te verminderen dat zij op de lange termijn een geriatrische last worden? Een provocerende opvatting! Oudere mensen zijn zich over het algemeen minder bewust van het risico. Gevaarlijke sporten en hobby's leiden niet alleen tot sterfte maar kunnen ook chronische handicaps veroorzaken. Wanneer je echter ouder bent dan 75 jaar, en je hebt een beperkt gehoor, gezichtsvermogen en mobiliteit, dan kan zelfs het oversteken van de weg een gevaarlijke bezigheid zijn.

| Wijze van transport           | Doden/100 miljoen km | Doden/100 miljoen uur | Doden/100 jaar | Genormaliseerde sterfterisico/expositieduur |
|-------------------------------|----------------------|-----------------------|----------------|---------------------------------------------|
| Marathon van Londen 1981-2004 | 32                   | 308                   | 2,67           | 12                                          |
| Motorfiets                    | 13,8                 | 440                   | 3,81           | 18                                          |
| Fiets                         | 5,4                  | 75                    | 0,65           | 3                                           |
| Auto                          | 0,7                  | 25                    | 0,21           | 1                                           |
| Vliegtuig                     | 0,035                | 16                    | 0,138          | 0,67                                        |
| Trein                         | 0,035                | 2                     | 0,017          | 0,08                                        |

**Tabel 1.** Aantal sterfgevallen tijdens de marathon van Londen gedurende de laatste 24 jaar in vergelijking met het 'European Safety Council' risico om te reizen in 2001-2002 (>580.000 marathons, 25 miljoen km, acht doden).

Oudere 'atleten' staan volop in de publiciteit van massa-evenementen (zoals marathons) en worden aangemoedigd om te gaan trainen en meerdere sporten uit te proberen. Zo zijn er bijzondere prestaties neergezet bij degenen die men aarzelend 'de ouderen' noemt. Een 70-jarige heeft de Mount Everest beklommen en een ander is de 'oudste succesvolle Engelse kanaalzwemmer' geworden. Aan de marathon van Londen in 2004 deden verscheidene 80-jarigen en één 92-jarige mee. De laatste finishte in 6 uur en 7 minuten.

De leeftijdsverdeling van de marathon van Londen liet het grootste aantal deelnemers van de laatste halve eeuw zien in de leeftijdsgroep 35-39-jarigen, gevolgd door 40-44-jarigen. Wat zijn de sterfterisico's van deze 'oudere' atleten? Dat zijn bijna uitsluitend coronaire hartziekten.<sup>5,7</sup> Voorspellen van dit risico is gecompliceerd. Regelmatige aërobe inspanning vermindert het algemene risico van coronaire aandoeningen en het risico op coronaire pathologie, maar er bestaat geen twijfel dat inspanning het risico op coronaire incidenten vergroot bij hen die ischemische (en andere) hartziekten hebben.<sup>6</sup> Inspanning voorkomt, maar lokt ook cardiale aandoeningen uit.

Om het risico voor een bepaald evenement, zoals de marathon van Londen met 32.000 deelnemers te voorspellen, moet men het volgende weten:

- de leeftijd- en sekseverdeling van de deelnemers;
- de incidentie van coronaire aandoeningen in de verschillende populatiesubgroepen die aan de marathon deelnemen;
- de duur van de blootstelling aan het risico (expositie-duur);
- de intensiteit van de inspanning en het daarmee gepaard gaande toegenomen risico.

Deze lijst bevat veel onbekende variabelen, maar er is meer.

Is het risico lineair met de tijd die besteed wordt aan het lopen van de marathon? Waarschijnlijk niet, maar data die een verminderd risico registreren bij wegwedstrijden over kortere afstanden suggereren dat de duur van de blootstelling belangrijk is en niet alleen de piekintensiteit van de inspanning, die hoger zou zijn bij races over kortere afstanden en juist een tegengesteld effect zou hebben.<sup>2</sup>

Berekeningen worden gecompliceerd door het feit dat marathonlopers niet een toevallig geselecteerde subgroep van de populatie zijn. Sommige oudere atleten beginnen met sporten om hun levensstijl te veranderen, met als doel het bekende hogere risico op coronaire aandoeningen te verminderen. Zij geloven misschien de claims van de nu in diskrediet geraakte hardlooptoeristen van de jaren zeventig, James Fixx (auteur van 'The complete book of running') en dr. Tom Bassler, dat wanneer zij genoeg trainen zij immuun worden voor of zelfs coronaire hartziekten kunnen doen omkeren.

"Ik had 15 jaar geleden een bypass-operatie en ik heb mijn hartaandoening genezen door marathons te lopen" zegt een hardloper die geld inzamelt voor de British Heart Foundation, in een nieuwsbericht van een Oost Angliaanse krant. Dit soort naïviteit is niet ongewoon en kan leiden tot een gevaarlijke ontkenning van symptomen.

De verdeling van coronair risico kan verstoord worden door dit soort factoren, waardoor voorspellingen moeilijk wor-

den. Wat zijn de vastgestelde risico's? Hardlopen is één van de weinige sporten met grote aantallen deelnemers, waarbij de tijd van blootstelling wordt gemeten.<sup>4,8</sup> Er hebben zich acht sterfgevallen voorgedaan geassocieerd met 580.000 lopers in de marathon van Londen sinds 1981. Eén stierf aan een subarachnoidale bloeding, twee ten gevolge van hypertrofische cardiomyopathie, en vijf aan coronaire hartziekten. (Er zijn ook vijf succesvolle reanimaties bij coronaire hartziekten geweest). Indien we alle acht doden tellen (inclusief de 22-jarige loper met een subarachnoidale bloeding) en de gemiddelde expositietijd stellen op 4,5 uur, geeft dit de volgende statistieken op het expositie sterfterisico van het lopen van de marathon van Londen (Tabel 1). Hier zijn de cijfers van 2005 nog niet in verwerkt. Het sterfterisico genormaliseerd voor 'expositietijd' kan vergeleken worden met dagelijkse risico's van transport over de weg in Europa, en is minder dan dat voor motorfietsen (tweederde), maar vier keer zoveel als fietsen gedurende eenzelfde tijd. De transportcijfers zijn van de 'European Safety Transport Council' en zijn bijgesteld sinds het gebruik in een eerdere publicatie.<sup>8,9</sup>

Gedurende de laatste jaren is het sterfterisico van reizen in Europa veiliger geworden met een grotere noemer (aantal mensen die reizen op de wegen).

Een toegenomen deelname van oudere atleten (noemer), met alle gezondheidsvoordelen voor de grote meerderheid, zal waarschijnlijk resulteren in een toename van het totale aantal sportgerelateerde doden. Echter, dit zal meer dan gecompenseerd worden door een afname in het algemene risico op overlijden door hen die regelmatig aan sport doen. Sterven op de golfbaan, alhoewel ongelukkig, zou meer sociaal geaccepteerd moeten worden wanneer de voordelen van inspanning, zelfs voor de speler met een hoog risico op een coronaire hartziekte, in het algemeen meer gewaardeerd worden.

Het uitsluiten van de oudere atleet aan sportbeoefening zou een laatste toevlucht moeten zijn.

## REFERENTIES

- 1 Epstein SE, Maron BJ. Sudden death and the competitive athlete. Perspectives on preparticipation screening studies. *J Am Coll Cardiol*;1986;7:220-230.
- 2 Frere JA, Maharam LG, van Camp SP. The risk of death in running road races. Does race length matter? *Phys Sportsmed* 2004;32.
- 3 Maron BJ. Cardiovascular risk to young persons on the athletic field. *Ann Intern Med* 1996;129:379-386.
- 4 Maron BJ, Poliac LC, Roberts WO. Risk for sudden cardiac death associated with marathon running. *J Am Coll Cardiol* 1996;28:428-431.

- 5 Northcote RJ, Flannigan C, et al. Sudden death and vigorous exercise. A study of 60 deaths associated with squash. *Br Heart J* 1986;55:198-203.
- 6 Siscovick DS, Weiss NS, Fletcher RH, et al. The incidence of primary cardiac arrest during vigorous exercise. *N Engl J Med* 1984;311:874-877.
- 7 Thompson PD, Funk EJ, Carleton RA, et al. Incidence of death during jogging in Rhode Island from 1975 through 1980. *JAMA* 1982;247:2535-2358.
- 8 Tunstall Pedoe DS. Sudden cardiac death in sport-spectre or preventable risk? *Br J Sports Med* 2000;34:137-140.
- 9 Tunstall Pedoe DS. Marathon myths and marathon medicine. In: Tunstoll Pedoe DS, ed. *Marathon medicine*. London: RSM Press, 2001:3-14.
- 10 Whittington RM, Banerjee A. Sport related sudden natural death in the City of Birmingham. *J R Soc Med* 1994;87:18-21.

Dit artikel is eerder verschenen in:  
*Br J Sports Med* 2004; 38(6): 671-672.

Vertaling: dr. B.M. Pluim en drs. N.M. Panhuyzen-Goedkoop

#### OVER DE AUTEUR

Dr. Dan Tunstall Pedoe, MA MB BChir (Cantab) D Phil (Oxon) FRCP was tot zijn pensioen in 2004 als cardioloog werkzaam in het St Bartholomew's Ziekenhuis en het Homerton Ziekenhuis in Londen. Hij was van 1980 tot 2005 medisch directeur van de Marathon van Londen. Dr Tunstall Pedoe was van 1983-1992 voorzitter van de British Association of Sport and Medicine, BASM (nu British Association of Sport and Exercise Medicine, BASEM). Hij heeft in 1985 het London Sports Medicine Institute opgericht en vijf jaar als medisch directeur geleid. In 2002 organiseerde hij een conferentie over het onderwerp 'Het sporthart en plotse hartdood in sport' aan het University College in Londen onder de auspiciën van de Physiological Society.

MA Master of Arts, MB Bachelor of Medicine, BChir Bachelor of Surgery, FRCP Fellow of the Royal College of Physicians, Cantab = Cambridge, D Phil = PhD, Oxon = Oxford
