# Supplementary material
Source: PubMed Central journal article supplement (PMC1725002)
Supplement: brjsmed_38_6_671__2.pdf [file brjsmed_38_6_671__2.pdf]

# 'The Italian JOB'

Plotse dood tijdens sportbeoefening of - nog erger - tijdens competitiesport heeft een grote lading. In het merendeel van de gevallen betreft het jonge mensen. Een dergelijke gebeurtenis heeft altijd grote nieuwsaarde: een dramatisch overlijden tijdens een gezonde bezigheid zoals sporten.

In het verleden hebben wij in Nederland de screening van topsporters verlaten, omdat de kosten-batenanalyse ongunstig uit zou vallen. De meeste grote, en zeker de olympische sportbonden hebben echter altijd wel een zekere vorm van verplichte medische keuring voor hun topsporters gehouden. De kosten-batenanalyse is echter nooit serieus onderzocht. Vanwaar dan die hernieuwde belangstelling om (top)sporters cardiologisch te screenen?

De nieuwe belangstelling in ons land komt enerzijds voort uit het 'Lausanne' protocol<sup>2</sup> en de richtlijn van de European Society of Cardiology voor cardiologische screening van sporters.<sup>3</sup>

Anderzijds heeft de wereldwijde belangstelling voor sport een grote economische waarde. Dit betreft zowel de producenten van sportkleding en -artikelen alsook de grote sportorganisaties, zoals IOC, FIFA, UCI en IAAF, die economisch afhankelijk zijn van tv-uitzendingen en indirect dus ook van de reclame-inkomsten. Deze grote organisaties zijn niet gebaat met publiciteit rond dramatische gebeurtenissen zoals een plotseling overlijden tijdens (top)sportbeoefening. Het is in het belang van meerdere partijen om op zijn minst aan te tonen dat wij deze dramatische gebeurtenissen proberen te voorkomen.

Het 'Lausanne' protocol is een revival van de screeninglijst die ooit is gemaakt door Gé van Enst (PSMS; periodiek sportmedisch onderzoek). Is er dan verder niets nieuws onder de zon?

Kritisch bekeken is er voor de nieuwe aanbeveling geen gedegen wetenschappelijk bewijs, zoals meerdere gerandomiseerde prospectieve onderzoeken. Het gaat hier eerder om 'expert' opinies. Wij moeten ook voorzichtig zijn om de 'Italian experience' tot absolute leidraad te verheffen, want het betreft een lokale ervaring. De Italiaanse studie bevat een hoog aandeel ARVD's (Aritmogene Rechter Ventrikel Dysplasie, een afwijking van de rechterkamer van het hart).

Waarom wordt het voorgestelde protocol dan door zo velen omarmd? De laatste jaren zijn er ontwikkelingen geweest waardoor wij beter in staat zijn om met behulp van het elektrocardiogram (ECG) ernstige cardiale ziektebeelden te herkennen. Een deel van deze beelden was twintig

jaar geleden nog niet bekend, ofschoon ze bijvoorbeeld wel al zijn beschreven in het proefschrift van Dolmans (1983).<sup>1</sup> Het ECG biedt ons op een relatief eenvoudige en goedkope manier de mogelijkheid om bijvoorbeeld het syndroom van Brugada, een lang-QT-syndroom en een aritmogene rechterkamerdysplasie te herkennen. Na verdere analyse kunnen deze ziektebeelden nu ook beter worden behandeld. In de 21ste eeuw bieden de ontwikkelingen in de genetica meer zekerheid in de diagnostiek en verdere genetische counseling. Op termijn zijn er ook nieuwe therapeutische mogelijkheden.

Voor de sportartsen ligt hier dan ook een grote uitdaging om de screening, zoals voorgesteld in het artikel van de werkgroep Cardiovasculaire Screening en Sport, een samenwerkingsverband van KNVB, NOC\*NSF, VSG, en de Werkgroep Cardiologie & Sport van Nederlandse Vereniging voor Cardiologie (NVVC), op te pakken (zie pagina 107). Zo mogelijk kunnen sportartsen met een registratie in Nederland ook een aanzet geven tot gedegen wetenschappelijk onderzoek op het terrein van 'plotse dood en sport'.

## REFERENTIES

1. Dolmans AJ. Plotse dood bij sport. Proefschrift, Rotterdam, 1983.
2. International Olympic Committee Medical Commission: Sudden cardiovascular death in sport: Lausanne recommendations. Available at [http://www.olympic.org/uk/organisation/commissions/medical/full\\_story\\_uk.asp?id=1178](http://www.olympic.org/uk/organisation/commissions/medical/full_story_uk.asp?id=1178). Accessed February 17, 2005
3. Pelliccia A, Fagard R, Bjørnstad HH et al. Recommendations for competitive sports participation in athletes with cardiovascular disease: A consensus document from the Study Group of Sports Cardiology of the Working Group of Cardiac Rehabilitation and Exercise Physiology and the Working Group of Myocardial and Pericardial Diseases of the European Society of Cardiology. *Eur Heart J* 2005;26:1422-1445.

## OVER DE AUTEUR

Dr. Jeff Senden is als cardioloog werkzaam in het Meander Medisch Centrum te Amersfoort. Hij is sinds 1988 betrokken als cardioloog-consulent bij een professionele wielerploeg.

Correspondentieadres: Dr. P.J. Senden, Meander Medisch Centrum, Postbus 1502, 3800 BM Amersfoort. Tel 033 - 850 5050.
